# Supplementary material for: Development and Testing of a Mobile App for Pain Management Among Cancer Patients Discharged From Hospital Treatment: Randomized Controlled Trial
Source: PubMed Central journal article supplement (PMC6658226; doi:10.2196/12542), 2019-05-29
Supplement: mhealth_v7i5e12542_app1.pdf [file mhealth_v7i5e12542_app1.pdf]

### Quality of life scores comparisons between Pain Guard and control groups

| QLQ-C30 scores         | Pain Guard (n=31)   |                     | Control (n=27)      |                     | W        |         | P-value  |         |
|------------------------|---------------------|---------------------|---------------------|---------------------|----------|---------|----------|---------|
|                        | Baseline            | 4 Weeks             | Baseline            | 4 Weeks             | Baseline | 4 Weeks | Baseline | 4 Weeks |
| Physical Functioning   | 46.67 (26.67,63.33) | 60 (16.67,76.67)    | 66.67 (43.33,73.33) | 53.33 (33.33,73.33) | 321.5    | 409     | 0.131    | 0.888   |
| Role Functioning       | 50 (16.67,66.67)    | 66.67 (33.33,75)    | 66.67 (33.33,66.67) | 50 (25,66.67)       | 331.5    | 502.5   | 0.167    | 0.181   |
| Emotional Functioning  | 66.67 (50,66.67)    | 83.33 (66.67,83.33) | 66.67 (66.67,83.33) | 66.67 (50,83.33)    | 318.5    | 552.5   | 0.104    | 0.03    |
| Cognitive Functioning  | 41.67 (33.33,50)    | 83.33 (66.67,100)   | 50 (33.33,66.67)    | 41.67 (33.33,54.17) | 316.5    | 768     | 0.109    | <.001   |
| Social Functioning     | 33.33 (25,50)       | 66.67 (33.33,66.67) | 50 (33.33,66.67)    | 33.33 (33.33,58.33) | 323.5    | 556     | 0.128    | 0.026   |
| Dyspnea                | 33.33 (0,33.33)     | 0 (0,16.67)         | 0 (0,33.33)         | 0 (0,33.33)         | 485.5    | 403.5   | 0.237    | 0.773   |
| Sleeping Disturbances  | 66.67 (33.33,66.67) | 0 (0,33.33)         | 33.33 (33.33,66.67) | 66.67 (50,66.67)    | 448      | 124     | 0.620    | <.001   |
| Appetite Loss          | 66.67 (33.33,66.67) | 33.33 (0,33.33)     | 33.33 (33.33,50)    | 33.33 (33.33,33.33) | 491.5    | 352.5   | 0.221    | 0.249   |
| Nausea and Vomiting    | 33.33 (16.67,50)    | 0 (0,33.33)         | 16.67 (16.67,33.33) | 33.33 (8.33,33.33)  | 491.5    | 272     | 0.242    | 0.014   |
| Constipation           | 66.67 (33.33,66.67) | 0 (0,33.33)         | 33.33 (16.67,66.67) | 33.33 (0,66.67)     | 513.5    | 261     | 0.119    | 0.008   |
| Diarrhea               | 0 (0,0)             | 0 (0,0)             | 0 (0,16.67)         | 0 (0,0)             | 350.5    | 416     | 0.110    | 0.921   |
| Fatigue                | 66.67 (55.56,66.67) | 33.33 (33.33,44.44) | 55.56 (33.33,66.67) | 55.56 (44.44,66.67) | 486      | 211.5   | 0.282    | 0.001   |
| Pain                   | 66.67 (66.67,100)   | 33.33 (0,33.33)     | 66.67 (41.67,83.33) | 50 (33.33,66.67)    | 516      | 177     | 0.116    | <.001   |
| Financial Difficulties | 66.67 (33.33,83.33) | 66.67 (33.33,100)   | 66.67 (33.33,66.67) | 66.67 (33.33,66.67) | 496.5    | 430     | 0.201    | 0.855   |
| Global Quality of Life | 33.33 (16.67,33.33) | 50 (50,50)          | 33.33 (29.17,41.67) | 33.33 (16.67,33.33) | 320.5    | 725.5   | 0.114    | <.001   |

NOTE. Data are presented as median (interquartile range).
